# Supplementary material
Source: ML conference proceedings conference paper supplement (https://openreview.net/forum?id=jVwIfsJLvh)

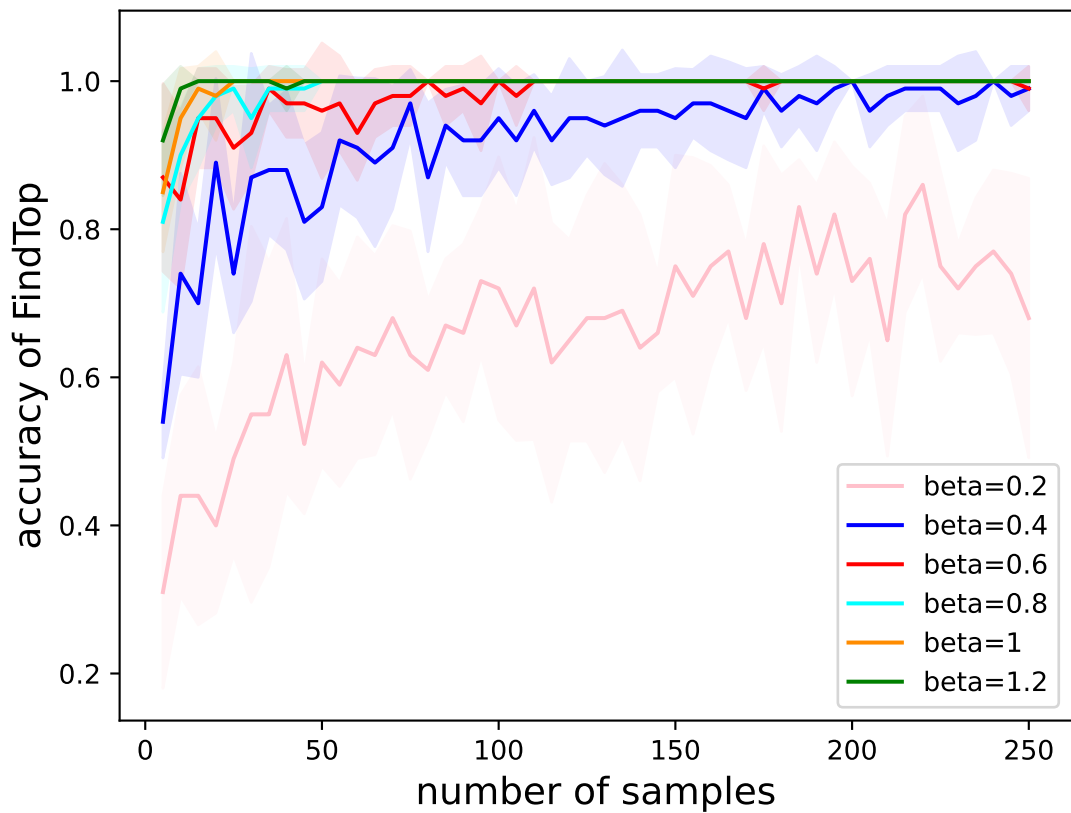

Supplement: supplementary_material [file FindTopAcc_n1000_k12_r10_p0.5_bigfont.pdf › FindTopAcc_n1000_k12_r10_p0.5_bigfont.pdf]

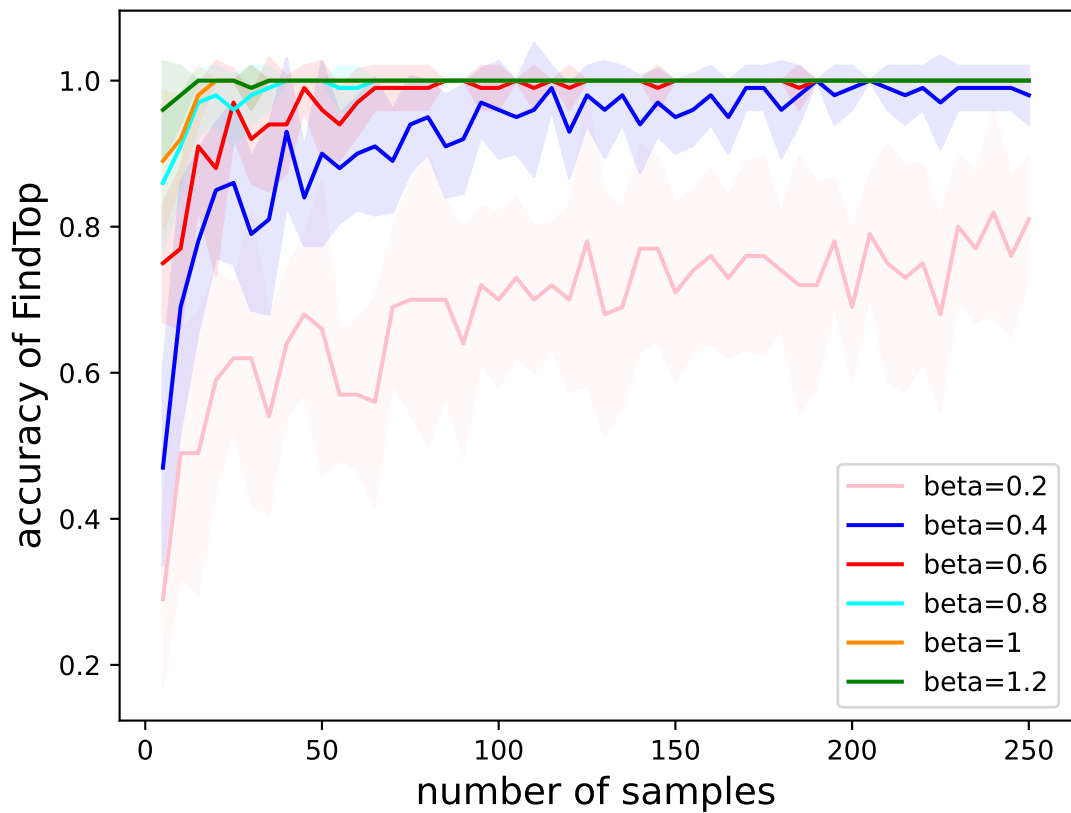

Supplement: supplementary_material [file FindTopAcc_n1000_k14_r12_p0.5_bigfont.pdf › FindTopAcc_n1000_k14_r12_p0.5_bigfont.pdf]

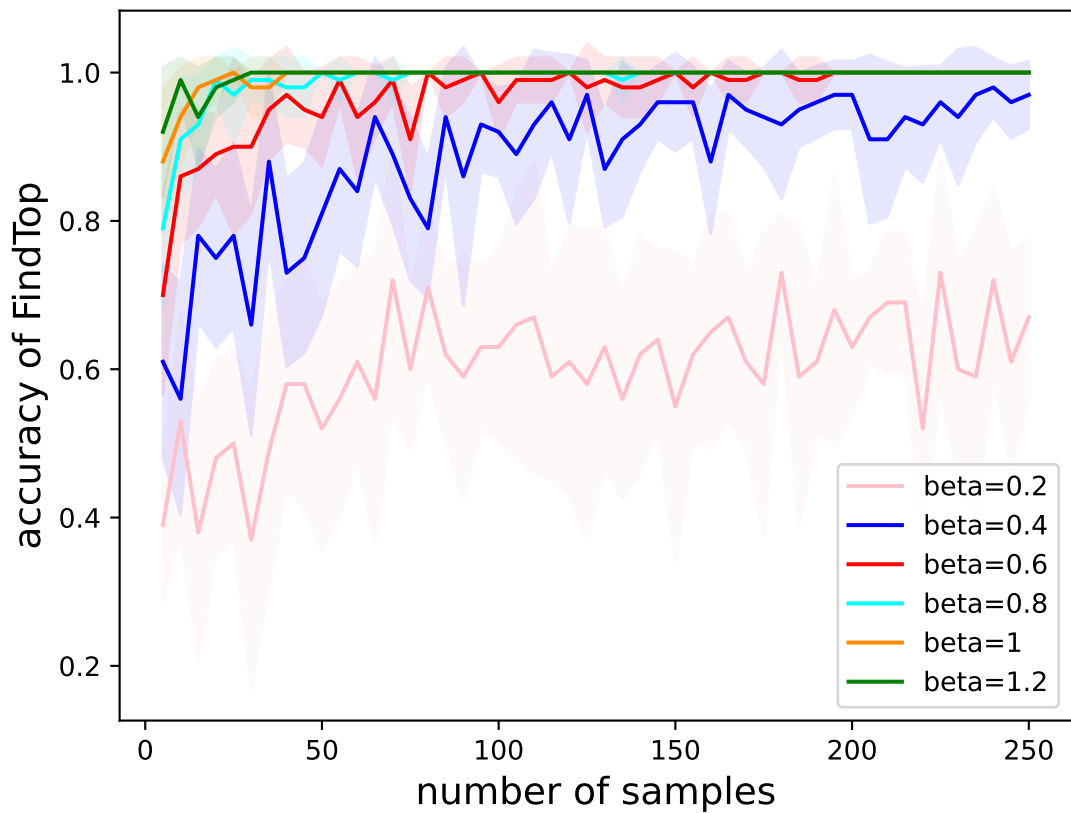

Supplement: supplementary_material [file FindTopAcc_n1000_k8_r6_p0.5_bigfont.pdf › FindTopAcc_n1000_k8_r6_p0.5_bigfont.pdf]

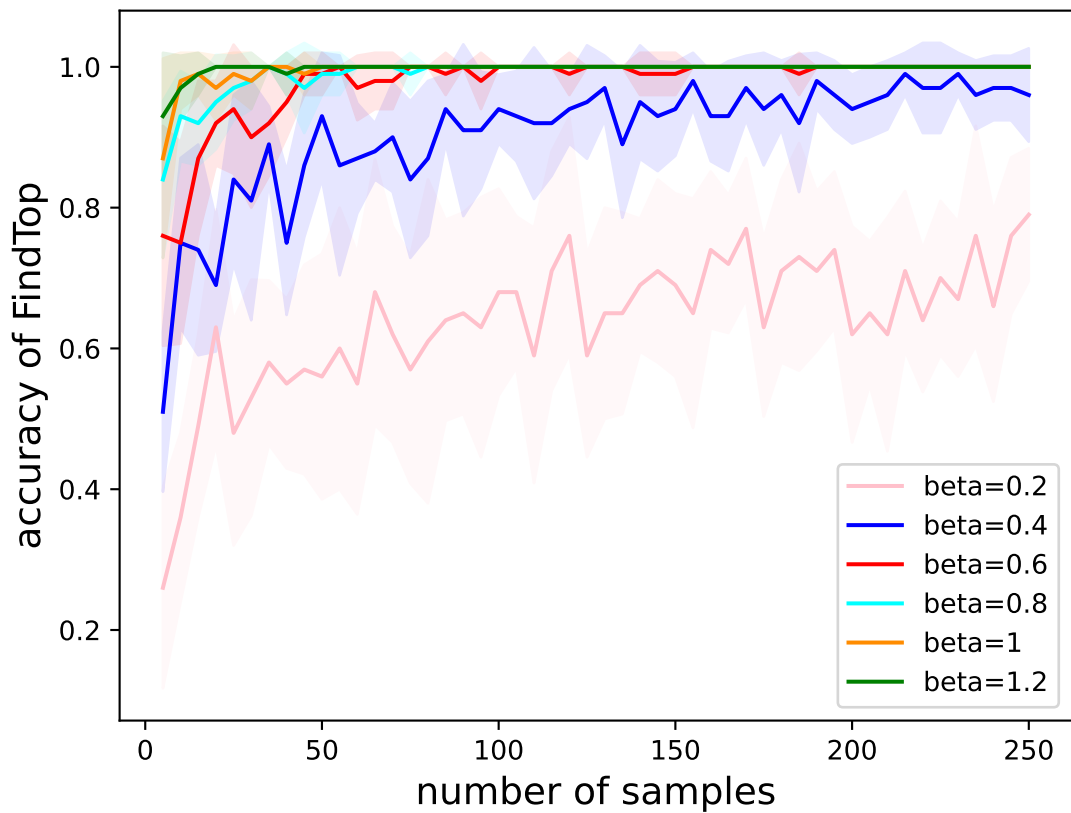

Supplement: supplementary_material [file FindTopAcc_n500_k10_r8_p0.5_bigfont.pdf › FindTopAcc_n500_k10_r8_p0.5_bigfont.pdf]

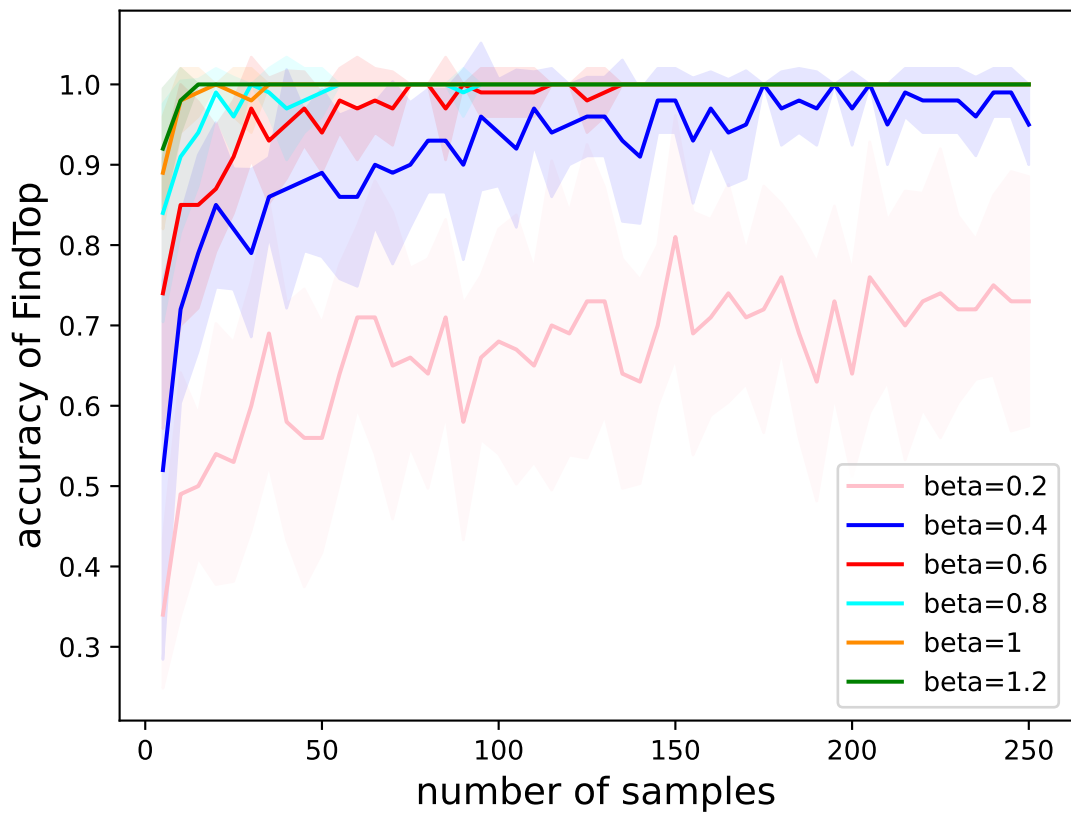

Supplement: supplementary_material [file FindTopAcc_n500_k12_r10_p0.5_bigfont.pdf › FindTopAcc_n500_k12_r10_p0.5_bigfont.pdf]

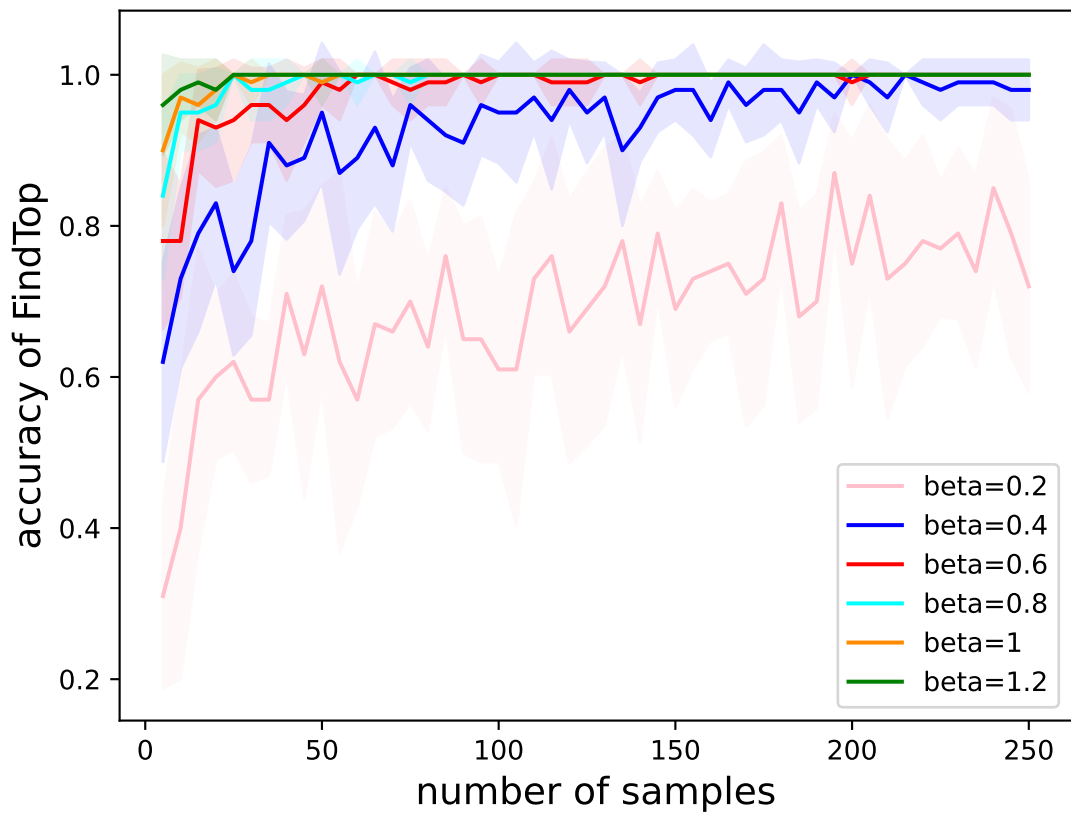

Supplement: supplementary_material [file FindTopAcc_n500_k14_r12_p0.5_bigfont.pdf › FindTopAcc_n500_k14_r12_p0.5_bigfont.pdf]

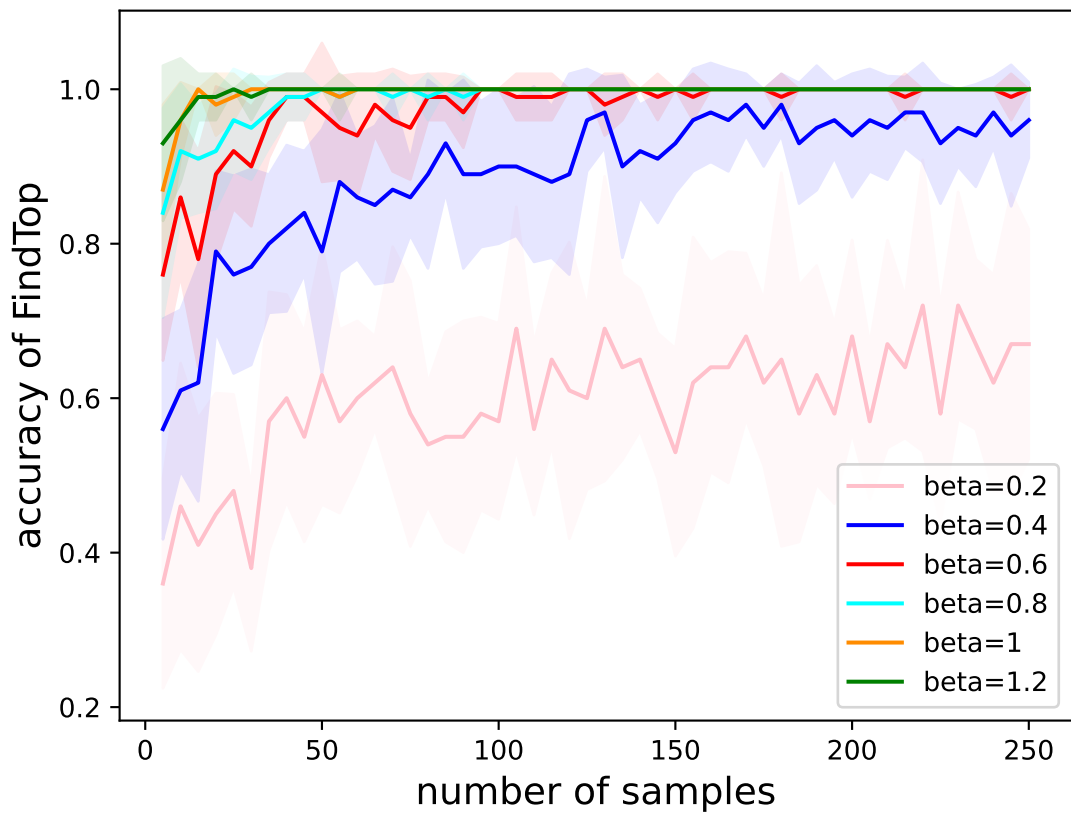

Supplement: supplementary_material [file FindTopAcc_n500_k8_r6_p0.5_bigfont.pdf › FindTopAcc_n500_k8_r6_p0.5_bigfont.pdf]
